# Supplementary material for: An Internet Tool for Creation of Cancer Survivorship Care Plans for Survivors and Health Care Providers: Design, Implementation, Use and User Satisfaction
Source: J Med Internet Res. 2009 Sep 4;11(3):e39. doi: 10.2196/jmir.1223 (PMC2762859; doi:10.2196/jmir.1223)

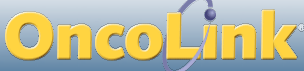
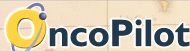
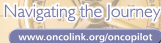

Abramson Cancer Center of the University of Pennsylvania
Quick Search:
GO advanced search

Cancer Types | Treatment | Coping | Resources | Ask the Experts | Library | Sponsors

Wednesday, April 15, 2009

### FEATURES

- OncoLife**
- Nurses Notes**
- OncoPilot**
- OncoTips**
- Abramson Cancer Center**
- Continuing Education**
- Newsletter**

### Cancer Clinical Trials Matching

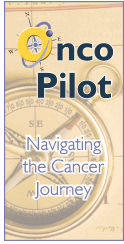

### ONCOLINK ART GALLERY

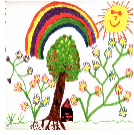

Today's artwork was donated by Olivia, a pediatric cancer patient who received treatment for cancer at The Children's Hospital of Philadelphia. Visit the Children's Art Gallery

### CANCER NEWS

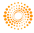 **REUTERS**

The latest news on cancer treatment, cancer research, oncology advances, and cancer clinical trials.

- Outcomes good with vulvar-conserving surgery even for large tumors [\[more\]](#)
- Retinoblastoma survivors often die from other malignancies [\[more\]](#)
- Longer hormone therapy may improve outcomes in advanced prostate cancer [\[more\]](#)
- Omacetaxine has potential to treat resistant leukemia [\[more\]](#)
- Marijuana use linked to nonseminoma testicular tumors [\[more\]](#)
- Autologous stem cell transplant useful in treatment of HIV-related lymphoma [\[more\]](#)

[More Cancer News >](#)

### WHAT'S NEW

- Ask The Experts**  
This is your chance to "Ask the Experts" everything you've always wanted to know about types of cancer, treatments and side effects.
- Cramping After BMT**
- Mucinous Adenocarcinoma of the Prostate**
- Greetings from CancerLand: This is a test...**  
From breast cancer survivor and OncoLink's Poet-in-Residence, Alysa Cummings
- Hürthle Cell Carcinoma**  
There are 4 main types of thyroid cancer, papillary (accounts for 75% of cases), follicular (15%), medullary (5%) and anaplastic (rare). Hürthle cell carcinoma is classified by the World Health Organization as a variant of follicular thyroid cancer, but others believe it is a distinctly separate disease.
- Legal Words of Wisdom: COBRA**  
COBRA gives workers and their families who lose their health benefits the right to continue group health benefits provided by their group health plan for limited periods of time under certain circumstances.
- Patient Art Gallery: Visitor Watercolor at NIH**  
From Artist David Beers
- The 21st Century Cancer ALERT (Access to Life-Saving Early detection, Research and Treatment) Act**
- Legal Words of Wisdom: Financial Power of Attorney**  
From Rodney Warner, Esq, Legal Clinic for the Disabled, Inc.
- Book Review: Choices in Breast Cancer Treatment**  
Alysa Cummings, OncoLink's Poet-in-Residence and breast cancer survivor, provides this book review.

[View All What's New](#) | [What's New RSS](#)

### HOT SPOT

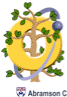

OncoLink has created an individualized plan of care based on the Institute of Medicine recommendations for cancer survivors. This free and easy to use program provides cancer survivors with information regarding the health risks they face as a result of cancer therapies. It encourages them to review the plan with their healthcare team to further assess their risk and become active participants in their follow up care.

[Develop your survivorship care plan today!](#)

[OncoLife en español](#)

### CANCER AWARENESS

## Minority Cancer Awareness Week

### April 20-26

**April 20-26, 2008 is Minority Cancer Awareness week**

This annual event drawing attention to the disproportionate impact cancer has on minorities. Minority populations are more likely to be diagnosed with certain types of cancer and more likely to die from the disease. [Read More...](#)

### FEATURED SECTIONS

[Smoking Cessation Aids](#)  
This article will review the available treatments, both pharmacologic (drug) and non-pharmacologic, to aid in successful smoking cessation.

[Smoking Cessation: Where do I Start?](#)  
The US Surgeon General stated that quitting smoking is the single most important step that smokers can take to enhance the length and quality of their lives.

[Did You Know...The Facts About Smoking and the Worldwide Crisis it has Caused?](#)  
Smoking is the number one cause of lung cancer.

### EXPERTS ON CALL

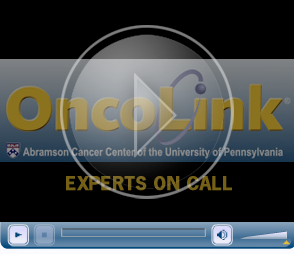

**Dr. Anil Vachani discusses lung cancer prevention and early detection**

Tune in to watch Dr. Anil Vachani, Assistant Professor at the University of Pennsylvania Medical Center discuss lung cancer risk and prevention, early detection of lung cancer, and smoking cessation including a new medication option.

### Keep up-to-date with the latest cancer Information

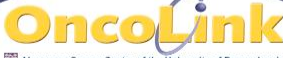

Abramson Cancer Center of the University of Pennsylvania

[www.oncolink.upenn.edu](http://www.oncolink.upenn.edu)

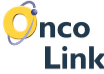
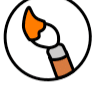

### Art Gallery

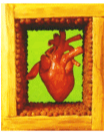

Art made by cancer patients and their loved ones to encourage vision, hope and imagination

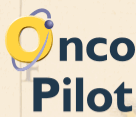

### Navigating the Cancer Journey

A guide developed to give suggestions on ways to make the time of diagnosis easier and to help one make the best decisions.

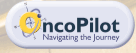

Supplement: Supplementary file 1 [file jmir_v11i3e39_app1.pdf]
